# Supplementary material
Source: PubMed Central journal article supplement (PMC5443095)
Supplement: khvi-10-10-971602-s001.pdf [file khvi-10-10-971602-s001.pdf]

1 **PARENT AND HEALTH CARE WORKERS QUESTIONNAIRES**

2  
3  
4 **PARENT QUESTIONNAIRE**

5 **Demographic data**

6  
7 **Are you**

- 8  mother  
9  father

10  
11 **What is your age ?**

- 12  < 25 ys  
13  26-40 ys  
14  > 40 ys

15  
16 **What is your nationality?**

- 17  Italian  
18  Non italian, please specify \_\_\_\_\_  
19  I have 2 nationalities, please specify \_\_\_\_\_

20  
21 **Where do you live?** Please insert the city where you live \_\_\_\_\_

22  
23 **How many child do you have ?**

- 24  1  
25  2  
26  3  
27  ≥4

28 Please, specify the age of each child \_\_\_\_\_

29  
30 **Education**

31 **What is the highest level of education you have completed?**

|                           | Mother                   | Father                   |
|---------------------------|--------------------------|--------------------------|
| 32 No schooling completed | <input type="checkbox"/> | <input type="checkbox"/> |
| 33 Primary school         | <input type="checkbox"/> | <input type="checkbox"/> |
| 34 Middle school          | <input type="checkbox"/> | <input type="checkbox"/> |
| 35 High school            | <input type="checkbox"/> | <input type="checkbox"/> |
| 36 Degree                 | <input type="checkbox"/> | <input type="checkbox"/> |

37  
38  
39 **Employment Status.**

40 ***Are you currently...?***

|               | Mother                   | Father                   |
|---------------|--------------------------|--------------------------|
| 41 Employed   | <input type="checkbox"/> | <input type="checkbox"/> |
| 42 Unemployed | <input type="checkbox"/> | <input type="checkbox"/> |

43  
44  
45  
46  
47 **Q1. Perceived benefits of vaccination**

48 **Do you think that vaccinations in general are** (Please select only one)

- 49  Very beneficial in preventing infectious diseases  
50  Beneficial  
51  Not beneficial  
52  I do not have any opinion about that

53  
54 **Q2. Did you receive appropriate and useful information about vaccination in general?** (Please  
55 select only one)

- 56  Yes  
57  No

58  
59

- 60 Q3. **If yes, did you receive information from** (more than 1 response is permitted)
- 61  Paediatrician
- 62  Immunization Clinic
- 63  Prenatal classes
- 64  Friends
- 65  Internet
- 66  Books and magazines
- 67
- 68
- 69 Q4. **Knowledge about meningitis**
- 70 **Have you heard of meningitis?** (Please select only one)
- 71  I have never heard of meningitis
- 72  My knowledge of meningitis is poor
- 73  My knowledge of meningitis is fair
- 74  My knowledge of meningitis is good
- 75
- 76
- 77 Q5. **Recognition of severity of meningitis**
- 78 **How severe do you think meningitis could be?** (Please select only one)
- 79  unthreatening disease
- 80  A mild disease
- 81  A severe disease
- 82  A life-threatening disease
- 83
- 84
- 85 Q6. **Knowledge about etiology of meningitis**
- 86 **Do you know that meningococcal meningitis is mainly caused by serogroup B and C in Italy?**
- 87 (Please select only one)
- 88  Yes
- 89  No
- 90
- 91 Q7. **Do you know that a Meningococcal C vaccine is approved for immunization?** (Please select
- 92 only one)
- 93  Yes
- 94  No
- 95
- 96 Q8. **Would you be likely to have your child immunized with the meningococcal B vaccine?** (Please
- 97 select only one)
- 98  Yes
- 99  No
- 100  I don't know/I have not any opinion about that
- 101
- 102 Q9. **If yes, would you be likely to immunized your child with the new meningococcal B vaccine**
- 103 **with hexavalent vaccination with an increase in the number of injections per session (3 injections**
- 104 **instead of 2 injections)** (Please select only one)
- 105  Yes
- 106  No
- 107  I don't know/I have not any opinion about that
- 108
- 109
- 110
- 111
- 112
- 113
- 114
- 115
- 116
- 117

118

## 119 **Health Care Workers Questionnaire**

120

### 121 **Demographic data**

122

#### 123 **What is your gender?**

124  Male

125  Female

126

#### 127 **What is your age?**

128  ≤ 35 ys

129  36-50 ys

130  >50 ys

131

#### 132 **What is your qualification?**

133  Specialist in Hygiene and Preventive Medicine

134  Paediatrician

135  Nurse

136

#### 137 **What is your occupational field?**

138  Immunization Clinic

139  Outpatient Clinic

140  Hospital

141  Other (Infectious Disease Clinic)

142

143 **Q1. Do you think the mortality rate of meningococcal meningitis in children less than 1 year of**  
144 **age is..?** (Please select only one)

145  Very Low

146  Low

147  High

148  Very High

149

150 **Q2. Do you think the risk of sequelae of meningococcal meningitis is..?** (Please select only one)

151  Very Low

152  Low

153  High

154  Very High

155

156 **Q3. Do you consider meningitis a disease** (Please select only one)

157  Of utmost importance for public health

158  Of importance, but not a priority for public health

159  Under control

160

161 **Q4. Do you consider the 4CMenB vaccine** (Please select only one)

162  A priority in infant immunization schedule

163  A preventive measure that should be evaluated on a case-by-case basis

164  Unnecessary preventive measure

165

166 **Q5. Do you know that EMA approved the 4CMenB vaccine?** (Please select only one)

167  Yes

168  No

169

170 **Q6. What kind of 4CMenB vaccine schedule do you consider the most appropriate?**(Please select  
171 only one)

172  Without concomitant routine infant immunization in the first year of life

173  With concomitant routine infant immunization in the first year of life

174  In the second year of life

175

176
